# Supplementary material for: Pleomorphic xanthoastrocytoma is a heterogeneous entity with pTERT mutations prognosticating shorter survival
Source: PubMed Central journal article supplement (PMC8751269; doi:10.1186/s40478-021-01308-1), 2022-01-10
Supplement: 40478_2021_1308_MOESM3_ESM.pdf [file 40478_2021_1308_MOESM3_ESM.pdf]

Supplementary table 3: Composition of cohorts mcPXA and histPXA in numbers

| Cohort                                   | Number of cases (n) |
|------------------------------------------|---------------------|
| <b>mcPXA</b>                             | 220                 |
| • <b>Available survival data</b>         | 77                  |
| • <b>pTERT sequencing</b>                | 95                  |
| • <b>BRAF sequencing</b>                 | 143                 |
| • <b>Histological reevaluation in HD</b> | 46                  |
| <b>histPXA</b>                           | 144                 |
| • <b>Available survival data</b>         | 53                  |
| • <b>pTERT sequencing</b>                | 50                  |
| • <b>BRAF sequencing</b>                 | 73                  |
| • <b>Histological reevaluation in HD</b> | 19                  |
