# Supplementary material for: Pleomorphic xanthoastrocytoma is a heterogeneous entity with pTERT mutations prognosticating shorter survival
Source: PubMed Central journal article supplement (PMC8751269; doi:10.1186/s40478-021-01308-1), 2022-01-10

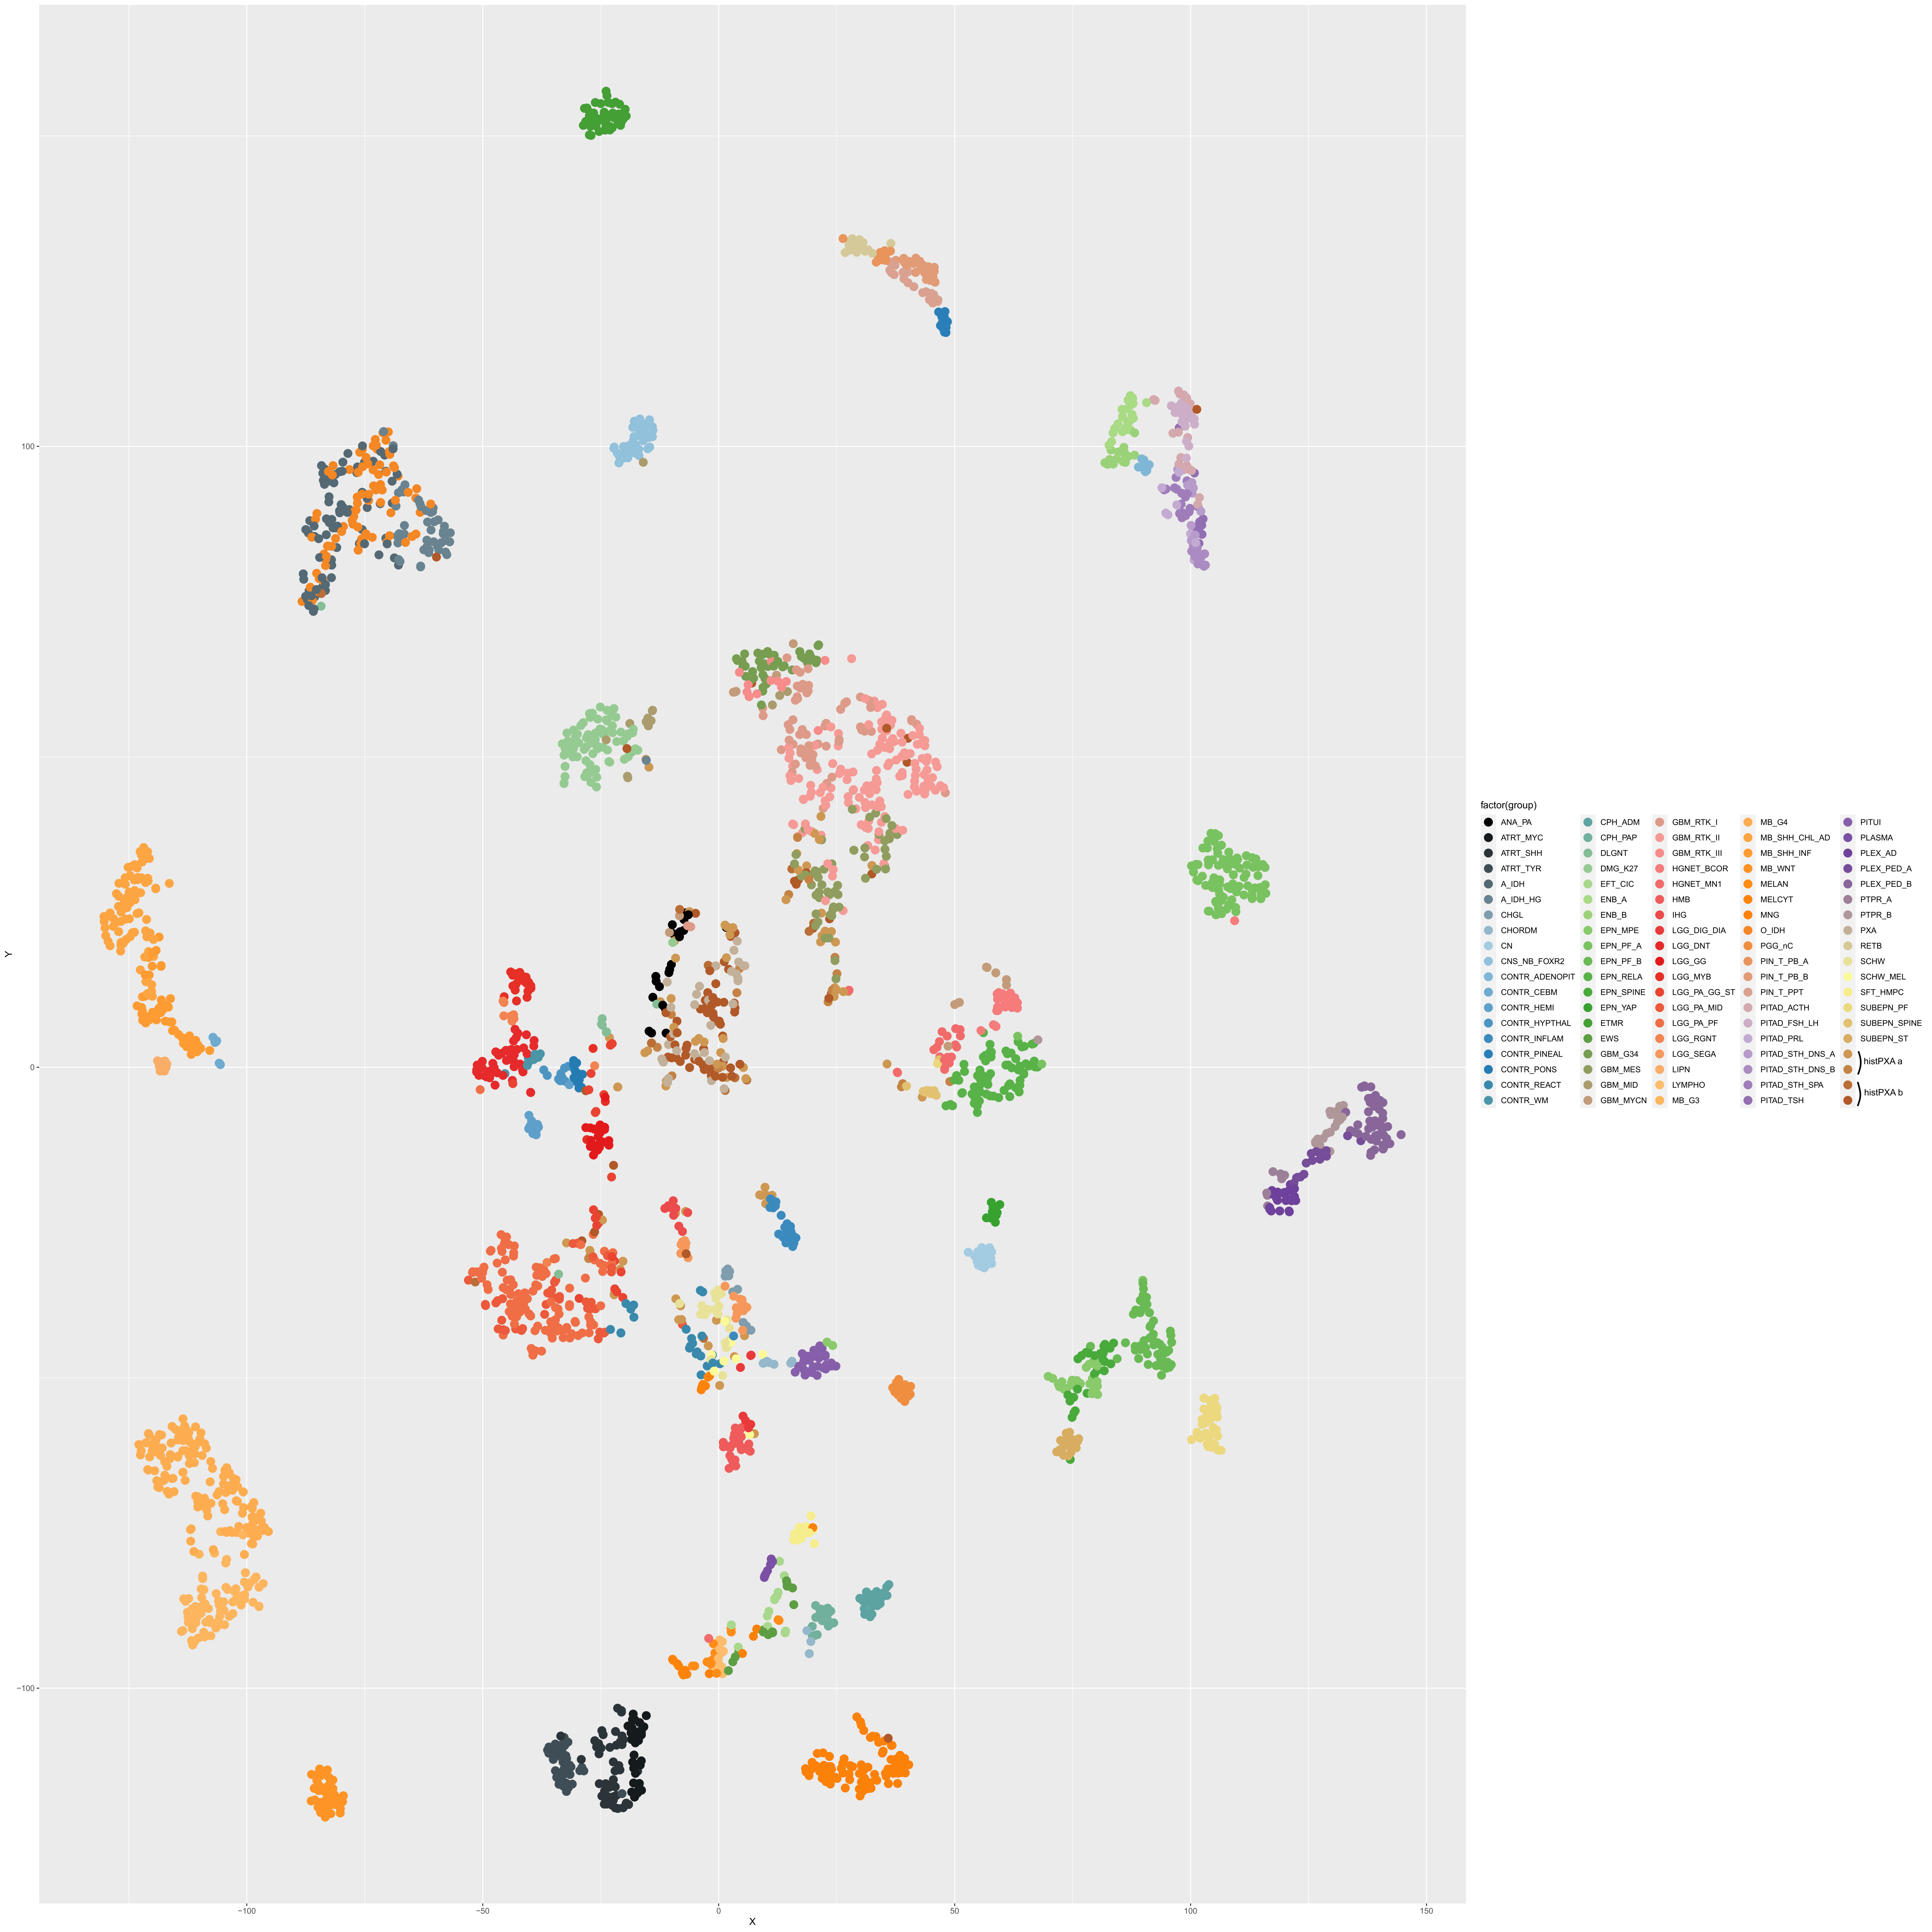

Supplement: 40478_2021_1308_MOESM4_ESM.pdf [file 40478_2021_1308_MOESM4_ESM.pdf]
